# Supplementary material for: Prevalence of Chronic Diseases and Alterations of Gut Microbiome in People of Ningxia China During Urbanization: An Epidemiological Survey
Source: Front Cell Infect Microbiol. 2021 Nov 3;11:707402. doi: 10.3389/fcimb.2021.707402 (PMC8595329; doi:10.3389/fcimb.2021.707402)
Supplement: Supplementary file 1 [file Table_1.xlsx]

## Sheet: Table S1
Table S1 Clinical characteristics of participants in this study
	MR N=538	MU N=529	PR N=765	PU N=675	p.overall
Gender (Male)	231 (42.94%)	179 (33.84%)	274 (35.82%)	232 (34.37%)	0.005
Age	53.00 [44.00-63.00]	49.00 [40.00-63.00]	53.00 [45.00-62.00]	55.00 [45.50-63.00]	<0.001
BMI	24.03 [22.03-26.43]	24.77 [22.51-26.90]	25.48 [23.35-27.78]	25.00 [22.43-27.44]	<0.001
Urine pH	5.00 [5.00-6.00]	5.00 [5.00-6.00]	5.00 [5.00-6.00]	5.00 [5.00-6.00]	0.865
Specific gravity	1.02 [1.02-1.02]	1.02 [1.01-1.02]	1.01 [1.01-1.02]	1.02 [1.01-1.02]	<0.001
Alanine aminotransferase	16.76 [13.03-22.99]	17.65 [12.74-25.93]	21.12 [15.66-30.08]	20.00 [14.52-28.37]	<0.001
Aspartate aminotransferase	20.58 [17.43-24.11]	20.53 [17.51-23.84]	22.66 [19.20-26.59]	22.21 [18.97-26.64]	<0.001
Total protein	77.00 [73.24-81.23]	78.80 [73.56-82.47]	84.24 [81.31-87.49]	85.76 [82.77-88.92]	<0.001
Albumin	48.45 [45.41-51.50]	50.11 [46.82-52.12]	49.60 [48.15-51.18]	49.53 [47.91-50.99]	<0.001
Globulin	28.90 [26.37-31.23]	28.70 [26.50-31.20]	34.50 [32.20-37.40]	35.90 [33.60-38.50]	<0.001
Albumin/globulin ratio	1.69 [1.56-1.82]	1.70 [1.55-1.87]	1.43 [1.32-1.54]	1.37 [1.28-1.48]	<0.001
Uric acid	226.44 [186.30-270.55]	237.00 [195.19-287.00]	282.40 [235.02-338.77]	311.04 [258.99-374.39]	<0.001
Urea	4.93 [3.95-5.89]	4.38 [3.63-5.34]	5.05 [4.15-6.22]	5.04 [4.26-6.08]	<0.001
Creatinine	69.19 [53.55-82.60]	75.21 [67.68-84.31]	80.21 [74.62-88.13]	81.54 [72.61-89.08]	<0.001
Glucose	4.63 [4.27-5.17]	4.73 [4.41-5.17]	4.30 [4.00-4.67]	4.50 [4.18-5.07]	<0.001
Glycosylated hemoglobin	5.40 [5.10-5.60]	5.30 [5.10-5.70]	5.20 [4.90-5.60]	5.20 [4.90-5.70]	<0.001
Triglyceride	0.88 [0.65-1.32]	1.00 [0.60-1.50]	1.45 [1.00-2.19]	1.53 [1.06-2.24]	<0.001
Total cholesterol	3.46 [2.96-4.08]	3.27 [2.87-3.76]	3.82 [3.36-4.35]	3.85 [3.36-4.33]	<0.001
High density lipoprotein	1.26 [1.08-1.50]	1.25 [1.08-1.48]	0.99 [0.85-1.16]	1.00 [0.84-1.18]	<0.001
Low density lipoprotein	2.35 [1.94-2.79]	2.46 [1.97-2.93]	2.62 [2.15-3.06]	2.65 [2.19-3.15]	<0.001
White blood cell count	5.46 [4.57-6.53]	5.64 [4.83-6.65]	6.04 [5.01-7.14]	5.89 [4.87-6.87]	<0.001
Neutrophil count	3.04 [2.36-3.83]	3.14 [2.56-3.85]	3.34 [2.70-4.14]	3.28 [2.62-3.94]	<0.001
Lymphocyte count	1.95 [1.56-2.35]	2.02 [1.68-2.43]	2.15 [1.78-2.60]	2.09 [1.74-2.54]	<0.001
Monocyte count	0.26 [0.20-0.33]	0.27 [0.22-0.33]	0.29 [0.24-0.36]	0.29 [0.23-0.34]	<0.001
Eosinophil count	0.07 [0.04-0.12]	0.08 [0.05-0.13]	0.09 [0.05-0.14]	0.09 [0.05-0.15]	<0.001
Basophil count	0.03 [0.02-0.04]	0.03 [0.02-0.05]	0.03 [0.02-0.05]	0.03 [0.02-0.05]	0.013
Neutrophil percentage	56.05 [50.48-62.30]	55.80 [50.30-61.50]	55.90 [50.80-61.40]	55.75 [50.35-61.23]	0.810
Lymphocyte percentage	36.50 [30.70-42.12]	36.70 [31.30-42.02]	36.40 [31.20-41.60]	36.50 [31.33-41.70]	0.890
Monocyte percentage	4.70 [4.00-5.60]	4.80 [4.10-5.60]	4.80 [4.10-5.60]	4.90 [4.10-5.70]	0.348
Eosinophil percentage	1.30 [0.70-2.40]	1.30 [0.80-2.12]	1.40 [0.90-2.40]	1.50 [0.90-2.50]	0.004
Basophil percentage	0.60 [0.40-0.80]	0.60 [0.40-0.80]	0.60 [0.40-0.70]	0.60 [0.40-0.80]	0.324
Red blood cell count	4.98 [4.68-5.35]	4.82 [4.48-5.18]	4.84 [4.54-5.15]	4.78 [4.49-5.09]	<0.001
Hemoglobin	154.00 [143.00-166.00]	148.00 [136.00-160.00]	144.00 [135.00-155.00]	144.00 [135.00-153.00]	<0.001
Hematocrit	47.00 [44.10-50.73]	45.40 [41.90-49.30]	45.00 [42.20-48.20]	45.10 [42.70-48.50]	<0.001
Mean corpuscular volume	94.60 [91.60-98.00]	94.80 [91.40-97.83]	93.60 [90.20-96.20]	94.90 [92.00-98.20]	<0.001
Mean corpuscular hemoglobin	31.10 [29.87-32.30]	30.70 [29.47-31.80]	30.00 [28.90-31.00]	30.20 [29.20-31.10]	<0.001
Mean Corpuscular Hemoglobin Concentration	327.00 [320.00-334.00]	324.00 [316.00-331.00]	322.00 [313.00-327.00]	318.00 [310.00-325.00]	<0.001
Coefficient of variation of red cell distribution width	11.60 [11.20-12.10]	11.70 [11.20-12.30]	12.10 [11.70-12.70]	12.20 [11.70-12.70]	<0.001
Red cell distribution width standard deviation	42.30 [40.30-44.82]	42.70 [40.80-44.52]	43.60 [41.40-46.00]	44.70 [42.40-46.90]	<0.001
Platelet count	193.00 [159.75-228.00]	189.00 [159.75-219.00]	194.00 [163.00-226.00]	188.00 [162.00-220.00]	0.210
Mean platelet volume	8.90 [8.40-9.40]	8.80 [8.20-9.40]	8.90 [8.40-9.50]	8.90 [8.30-9.60]	0.011
Platelet distribution width	16.35 [16.03-16.70]	16.30 [16.10-16.70]	16.30 [16.00-16.60]	16.30 [16.00-16.70]	0.561
Plateletcrit	0.17 [0.14-0.19]	0.16 [0.14-0.18]	0.17 [0.14-0.19]	0.17 [0.14-0.19]	0.012
Large platelet count	55.00 [44.00-65.00]	52.00 [44.00-63.00]	55.00 [47.00-66.00]	55.00 [46.00-64.00]	0.001
Platelet large cell ratio	28.95 [24.10-34.30]	28.20 [23.45-33.45]	29.40 [24.10-34.50]	29.15 [23.90-35.18]	0.070
MR: Mountain rural, MU: Mountain urban, PR: Plain rural, PU: Plain urban. Categorical data are presented as numbers with percentages in round parentheses and were tested using the Chi-square test. Continuous data are presented as median and IQR in squared parentheses and were tested using the Kruskal-Wallis H test. P values <.05 were considered statistically significant.
