# Supplementary material for: Prevalence of Chronic Diseases and Alterations of Gut Microbiome in People of Ningxia China During Urbanization: An Epidemiological Survey
Source: Front Cell Infect Microbiol. 2021 Nov 3;11:707402. doi: 10.3389/fcimb.2021.707402 (PMC8595329; doi:10.3389/fcimb.2021.707402)
Supplement: Supplementary file 2 [file Table_2.xlsx]

## Sheet: Table S2
Table S2 Multivariate logistic regression analysis on the risk for chronic diseases
Parameter	odds ratio	conf low	conf high	pvalue	Signif
Diabetes (Age)	1.05673	1.04398	1.07005	1.70357e-18	***
Diabetes MUvsMR	1.43562	0.880047	2.35965	0.149182
Diabetes PRvsMR	1.64882	1.06759	2.59707	0.0269654	*
Diabetes PUvsMR	2.59246	1.70773	4.02973	1.28558e-05	***
Diabetes (Gender, Male)	1.30967	0.987681	1.73325	0.0597977
DyslipidemiaAge	1.01549	1.00877	1.02227	5.82809e-06	***
Dyslipidemia MUvsMR	1.40017	1.07498	1.82602	0.0127225	*
Dyslipidemia PRvsMR	5.57323	4.36339	7.14996	2.27541e-42	***
Dyslipidemia PUvsMR	5.14361	4.00629	6.63247	3.55594e-37	***
Dyslipidemia (Gender, Male)	1.77887	1.48561	2.13295	4.25731e-10	***
Fatty liver disease (Age)	1.01624	1.00876	1.02384	2.07447e-05	***
Fatty liver disease MUvsMR	2.83726	1.98068	4.11862	2.19529e-08	***
Fatty liver disease PRvsMR	5.29287	3.82256	7.46663	1.41175e-22	***
Fatty liver disease PUvsMR	5.32399	3.8267	7.54186	3.60174e-22	***
Fatty liver disease (Gender, Male)	1.23791	1.02081	1.49997	0.0296552	*
P values < .05 were considered statistically significant. Data expressed as odds ratio (95% CI).
