# Supplementary material for: Prevalence of Chronic Diseases and Alterations of Gut Microbiome in People of Ningxia China During Urbanization: An Epidemiological Survey
Source: Front Cell Infect Microbiol. 2021 Nov 3;11:707402. doi: 10.3389/fcimb.2021.707402 (PMC8595329; doi:10.3389/fcimb.2021.707402)
Supplement: Supplementary file 4 [file Table_4.xlsx]

## Sheet: Table S4
Table S4 The adonis and anosim analysis results
group	adonisVariation (R2)	Pr (>F)	Sig	anosimR	P_value	Sig
MR vs MU	0.0183485	0.001	***	0.0389216	0.001	***
MR vs PU	0.0343479	0.001	***	0.0698869	0.006	**
MR vs PR	0.0322352	0.001	***	0.0818648	0.001	***
MU vs PU	0.0162849	0.001	***	-0.0214932	0.841
MU vs PR	0.0156982	0.001	***	-0.00313243	0.537
PU vs PR	0.00338623	0.002	**	0.00382519	0.033	*
MR: Mountain rural, MU: Mountain urban, PR: Plain rural, PU: Plain urban
