# Supplementary material for: Prevalence of Chronic Diseases and Alterations of Gut Microbiome in People of Ningxia China During Urbanization: An Epidemiological Survey
Source: Front Cell Infect Microbiol. 2021 Nov 3;11:707402. doi: 10.3389/fcimb.2021.707402 (PMC8595329; doi:10.3389/fcimb.2021.707402)
Supplement: Supplementary file 5 [file Table_5.xlsx]

## Sheet: Table S5
Table S5 Diet questionnaire results of the 1145 participants who have had microbiota gut 16S rRNA test in this study
	MR N=149	MU N=172	PR N=403	PU N=421	p.overall	p.MR vs MU	p.MR vs PR	p.MU vs PU	p.PR vs PU
Gender (Male)	69 (46.31%)	68 (39.53%)	157 (38.96%)	148 (35.15%)	0.115	0.434	0.431	0.434	0.434
Age	53.00 [43.00-63.00]	53.00 [41.00-65.25]	53.00 [45.50-61.00]	55.00 [45.00-63.00]	0.510	0.863	0.863	0.863	0.834
BMI	24.12 [22.05-26.51]	25.34 [23.02-27.06]	25.53 [23.72-28.21]	25.21 [22.77-27.61]	<0.001	0.026	<0.001	0.717	0.014
Rice (g/Year)	5400.00 [2400.00-13000.00]	16900.00 [7650.00-39650.00]	54750.00 [36500.00-73000.00]	36500.00 [36500.00-54750.00]	<0.001	<0.001	<0.001	<0.001	<0.001
Flour (g/Year)	109500.00 [73000.00-182500.00]	73000.00 [54750.00-146000.00]	54750.00 [36500.00-73000.00]	54750.00 [36500.00-54750.00]	<0.001	<0.001	<0.001	<0.001	0.150
Miscellaneous grain (g/Year)	0.00 [0.00-1800.00]	5200.00 [1200.00-15600.00]	2000.00 [200.00-9125.00]	9000.00 [2400.00-18250.00]	<0.001	<0.001	<0.001	0.025	<0.001
Potatoes (g/Year)	36500.00 [18250.00-73000.00]	31200.00 [10400.00-36500.00]	7800.00 [3000.00-15600.00]	7800.00 [3600.00-15600.00]	<0.001	<0.001	<0.001	<0.001	0.744
Fried pasta (g/Year)	450.00 [100.00-1800.00]	600.00 [0.00-2450.00]	400.00 [0.00-1200.00]	300.00 [0.00-1800.00]	0.378	0.981	0.442	0.442	0.981
Meat (g/Year)	600.00 [100.00-3600.00]	5200.00 [1200.00-10400.00]	9125.00 [2600.00-18250.00]	9125.00 [2600.00-18250.00]	<0.001	<0.001	<0.001	<0.001	0.847
Poultry (g/Year)	1200.00 [200.00-3000.00]	1200.00 [300.00-5200.00]	5200.00 [1800.00-7800.00]	3600.00 [1200.00-5200.00]	<0.001	0.268	<0.001	<0.001	0.001
Aquatic products (g/Year)	0.00 [0.00-225.00]	300.00 [0.00-1275.00]	1200.00 [200.00-2400.00]	1200.00 [400.00-3000.00]	<0.001	<0.001	<0.001	<0.001	0.002
Fresh milk (g/Year)	0.00 [0.00-100.00]	0.00 [0.00-4850.00]	0.00 [0.00-16200.00]	10400.00 [0.00-36500.00]	<0.001	0.010	<0.001	<0.001	<0.001
Cheese (g/Year)	0.00 [0.00-0.00]	0.00 [0.00-0.00]	0.00 [0.00-0.00]	0.00 [0.00-0.00]	0.204	0.296	0.350	0.883	0.296
Yogurt (g/Year)	0.00 [0.00-0.00]	0.00 [0.00-3150.00]	0.00 [0.00-3000.00]	100.00 [0.00-20800.00]	<0.001	<0.001	0.001	0.001	<0.001
Eggs (cell/Year)	2600.00 [100.00-10400.00]	10400.00 [5200.00-18250.00]	5200.00 [1200.00-10400.00]	7800.00 [2600.00-18250.00]	<0.001	<0.001	0.040	0.022	<0.001
Tofu (g/Year)	125.00 [0.00-1300.00]	5200.00 [1200.00-15600.00]	2600.00 [950.00-6500.00]	3600.00 [1200.00-9600.00]	<0.001	<0.001	<0.001	0.290	0.003
Soya-bean milk (g/Year)	0.00 [0.00-0.00]	0.00 [0.00-25.00]	0.00 [0.00-0.00]	0.00 [0.00-6000.00]	<0.001	<0.001	<0.001	<0.001	<0.001
Dry beans (g per Year)	0.00 [0.00-0.00]	50.00 [0.00-1200.00]	0.00 [0.00-600.00]	0.00 [0.00-2400.00]	<0.001	<0.001	<0.001	0.687	0.018
Vegetables (g/Year)	36500.00 [15600.00-54750.00]	36500.00 [36500.00-73000.00]	73000.00 [36500.00-73000.00]	73000.00 [36500.00-91250.00]	<0.001	<0.001	<0.001	<0.001	0.079
Dried vegetables (g/Year)	0.00 [0.00-0.00]	0.00 [0.00-0.00]	0.00 [0.00-250.00]	0.00 [0.00-600.00]	<0.001	0.896	<0.001	<0.001	0.124
Salted vegetables (g/Year)	2600.00 [0.00-9600.00]	200.00 [0.00-4500.00]	2000.00 [500.00-4900.00]	500.00 [0.00-2400.00]	<0.001	0.002	0.523	0.866	<0.001
Kimchi (g/Year)	0.00 [0.00-5200.00]	0.00 [0.00-1500.00]	100.00 [0.00-1800.00]	0.00 [0.00-750.00]	<0.001	0.391	0.391	0.045	0.001
Pastry (g/Year)	0.00 [0.00-0.00]	12.50 [0.00-1200.00]	150.00 [0.00-1800.00]	300.00 [0.00-2600.00]	<0.001	<0.001	<0.001	0.001	0.014
MR: Mountain rural, MU: Mountain urban, PR: Plain rural, PU: Plain urban. Categorical data are presented as numbers with percentages in round parentheses and were tested using the chi-square test or Fisher’s exact test. Continuous data are presented as median and interquartile range in squared parentheses and were tested using the Mann-Whitney U test. P values <.05 were considered statistically s…
