# Supplementary material for: Prevalence of Chronic Diseases and Alterations of Gut Microbiome in People of Ningxia China During Urbanization: An Epidemiological Survey
Source: Front Cell Infect Microbiol. 2021 Nov 3;11:707402. doi: 10.3389/fcimb.2021.707402 (PMC8595329; doi:10.3389/fcimb.2021.707402)
Supplement: Supplementary file 6 [file Table_6.xlsx]

## Sheet: Table S6
Table S6 Taxonomic profiles of the gut microbiota at the phylum level
	MR N=152	MU N=173	PR N=413	PU N=439	p.MR vs MU	p.MR vs PR	p.MU vs PU	p.PR vs PU
Firmicutes	0.6412 [0.5400-0.7382]	0.6138 [0.5168-0.7221]	0.6000 [0.4668-0.7096]	0.5915 [0.4760-0.7191]	0.262	0.013	0.136	0.938
Bacteroidetes	0.2409 [0.1440-0.3641]	0.2737 [0.1733-0.3605]	0.2761 [0.1412-0.4220]	0.2851 [0.1343-0.4056]	0.738	0.738	0.787	0.908
Proteobacteria	0.0207 [0.0094-0.0528]	0.0217 [0.0106-0.0557]	0.0448 [0.0179-0.1081]	0.0416 [0.0195-0.1053]	0.687	<0.001	<0.001	0.941
Actinobacteria	0.0153 [0.0060-0.0443]	0.0169 [0.0058-0.0396]	0.0054 [0.0020-0.0142]	0.0091 [0.0039-0.0276]	0.911	<0.001	<0.001	<0.001
Verrucomicrobia	0.0002 [<0.0001-0.0095]	0.0002 [<0.0001-0.0097]	0.0001 [0.0000-0.0020]	<0.0001 [0.0000-0.0010]	0.694	0.005	<0.001	0.003
Tenericutes	0.0003 [0.0000-0.0028]	0.0001 [0.0000-0.0026]	0.0000 [0.0000-0.0009]	0.0000 [0.0000-0.0003]	0.500	<0.001	<0.001	0.022
Cyanobacteria	1e-04 [0e+00-2e-04]	1e-04 [0e+00-3e-04]	1e-04 [0e+00-4e-04]	0e+00 [0e+00-2e-04]	0.125	0.411	0.065	0.125
Candidate_division_TM7	2e-04 [1e-04-4e-04]	2e-04 [1e-04-4e-04]	2e-04 [1e-04-5e-04]	2e-04 [1e-04-8e-04]	0.929	0.929	0.108	0.076
MR: Mountain rural, MU: Mountain urban, PR: Plain rural, PU: Plain urban. Data are presented as median and interquartile range in squared parentheses and were tested using the Wilcoxon rank-sum test. P values <.05 were considered statistically significant.
