# Supplementary material for: Prevalence of Chronic Diseases and Alterations of Gut Microbiome in People of Ningxia China During Urbanization: An Epidemiological Survey
Source: Front Cell Infect Microbiol. 2021 Nov 3;11:707402. doi: 10.3389/fcimb.2021.707402 (PMC8595329; doi:10.3389/fcimb.2021.707402)
Supplement: Supplementary file 7 [file Table_7.xlsx]

## Sheet: Table S7
Table S7 Alpha diversity of the four groups
	MR N=152	MU N=173	PR N=413	PU N=439	p.MR vs MU	p.MR vs PR	p.MU vs PU	p.PR vs PU
Ace	546.1158 [453.3556-618.5989]	548.0907 [482.3251-627.7519]	473.9746 [382.3901-554.9696]	427.6623 [306.4282-521.0772]	0.211	<0.001	<0.001	<0.001
Chao1	551.5043 [456.4921-618.7781]	553.4038 [473.7778-631.5600]	469.0185 [366.1000-559.1071]	423.6087 [290.3571-519.9303]	0.336	<0.001	<0.001	<0.001
Shannon	3.9013 [3.5546-4.1986]	3.9289 [3.6125-4.1935]	3.7677 [3.4178-4.1023]	3.7338 [3.3463-4.0137]	0.594	0.014	<0.001	0.124
Simpson	0.0474 [0.0338-0.0688]	0.0451 [0.0355-0.0626]	0.0554 [0.0373-0.0796]	0.0527 [0.0397-0.0784]	0.824	0.013	0.003	0.941
MR: Mountain rural, MU: Mountain urban, PR: Plain rural, PU: Plain urban. Data are presented as median and interquartile range in squared parentheses and were tested using the Wilcoxon rank-sum test. P values <.05 were considered statistically significant.
