# Supplementary material for: Prevalence of Chronic Diseases and Alterations of Gut Microbiome in People of Ningxia China During Urbanization: An Epidemiological Survey
Source: Front Cell Infect Microbiol. 2021 Nov 3;11:707402. doi: 10.3389/fcimb.2021.707402 (PMC8595329; doi:10.3389/fcimb.2021.707402)
Supplement: Supplementary file 8 [file Table_8.xlsx]

## Sheet: Table S8
Table S8 Taxonomic profiles of the main genera
	MR N=152	MU N=173	PR N=413	PU N=439	p.MR vs MU	p.MR vs PR	p.MU vs PU	p.PR vs PU
Bacteroides	0.0731 [0.0314-0.1692]	0.1623 [0.0644-0.2464]	0.1507 [0.0683-0.2878]	0.1518 [0.0613-0.3061]	<0.001	<0.001	0.721	0.788
Faecalibacterium	0.1374 [0.0798-0.2063]	0.1409 [0.0605-0.2103]	0.1123 [0.0613-0.1788]	0.0985 [0.0509-0.1545]	0.476	0.012	<0.001	0.012
Ruminococcaceae_uncultured	0.0642 [0.0178-0.1288]	0.0621 [0.0163-0.1144]	0.0286 [0.0089-0.0637]	0.0257 [0.0074-0.0713]	0.684	<0.001	<0.001	0.684
Prevotella	0.0106 [0.0006-0.1735]	0.0046 [0.0005-0.0410]	0.0004 [0.0001-0.0285]	0.0004 [0.0001-0.0228]	0.035	<0.001	<0.001	0.434
Lachnospiraceae_incertae_sedis	0.0262 [0.0149-0.0425]	0.0284 [0.0189-0.0489]	0.0417 [0.0262-0.0708]	0.0489 [0.0267-0.0772]	0.030	<0.001	<0.001	0.031
Subdoligranulum	0.0326 [0.0181-0.0503]	0.0352 [0.0159-0.0551]	0.0246 [0.0105-0.0464]	0.0278 [0.0075-0.0586]	0.511	0.060	0.060	0.611
Escherichia-Shigella	0.0027 [0.0004-0.0104]	0.0025 [0.0005-0.0132]	0.0113 [0.0020-0.0510]	0.0084 [0.0012-0.0368]	0.633	<0.001	<0.001	0.194
Pseudobutyrivibrio	0.0256 [0.0105-0.0593]	0.0242 [0.0109-0.0468]	0.0187 [0.0069-0.0376]	0.0146 [0.0053-0.0309]	0.458	0.001	<0.001	0.013
Ruminococcus	0.0232 [0.0073-0.0511]	0.0201 [0.0081-0.0434]	0.0159 [0.0051-0.0351]	0.0135 [0.0020-0.0400]	0.497	0.011	0.007	0.193
Blautia	0.0112 [0.0062-0.0207]	0.0123 [0.0072-0.0193]	0.0188 [0.0100-0.0350]	0.0157 [0.0074-0.0297]	0.209	<0.001	0.009	0.009
Dialister	0.0006 [0.0001-0.0278]	0.0043 [0.0002-0.0364]	0.0007 [0.0001-0.0187]	0.0027 [0.0001-0.0324]	0.219	0.126	0.436	0.003
Megamonas	0.0001 [<0.0001-0.0010]	0.0001 [<0.0001-0.0009]	0.0001 [<0.0001-0.0013]	0.0001 [<0.0001-0.0065]	0.281	0.400	0.971	0.400
Bifidobacterium	0.0118 [0.0033-0.0376]	0.0132 [0.0035-0.0310]	0.0028 [0.0005-0.0100]	0.0049 [0.0008-0.0179]	0.978	<0.001	<0.001	0.001
Lachnospira	0.0038 [0.0010-0.0113]	0.0047 [0.0009-0.0140]	0.0082 [0.0014-0.0269]	0.0078 [0.0017-0.0253]	0.450	0.001	0.006	0.910
Roseburia	0.0083 [0.0036-0.0195]	0.0085 [0.0035-0.0185]	0.0101 [0.0041-0.0218]	0.0095 [0.0032-0.0190]	0.953	0.829	0.829	0.808
Alistipes	0.0106 [0.0013-0.0213]	0.0145 [0.0019-0.0320]	0.0071 [0.0009-0.0204]	0.0050 [0.0002-0.0169]	0.100	0.167	<0.001	0.018
Lachnospiraceae_unclassified	0.0091 [0.0051-0.0146]	0.0105 [0.0061-0.0162]	0.0132 [0.0075-0.0201]	0.0125 [0.0060-0.0194]	0.087	<0.001	0.193	0.160
Christensenellaceae_uncultured	0.0060 [0.0004-0.0197]	0.0044 [0.0002-0.0241]	0.0014 [<0.0001-0.0092]	0.0005 [<0.0001-0.0086]	0.940	<0.001	<0.001	0.079
Lachnospiraceae_uncultured	0.0048 [0.0023-0.0086]	0.0058 [0.0028-0.0104]	0.0086 [0.0040-0.0167]	0.0098 [0.0044-0.0161]	0.090	<0.001	<0.001	0.942
Phascolarctobacterium	0.0033 [0.0001-0.0155]	0.0056 [0.0001-0.0184]	0.0029 [<0.0001-0.0166]	0.0015 [<0.0001-0.0164]	0.351	0.351	0.011	0.207
Akkermansia	0.0002 [<0.0001-0.0095]	0.0002 [<0.0001-0.0097]	0.0001 [0.0000-0.0019]	<0.0001 [0.0000-0.0010]	0.708	0.005	<0.001	0.003
Coprococcus	0.0070 [0.0023-0.0146]	0.0053 [0.0022-0.0141]	0.0060 [0.0022-0.0135]	0.0048 [0.0014-0.0111]	0.297	0.297	0.205	0.032
Clostridium_sensu_stricto_1	0.0026 [0.0005-0.0116]	0.0012 [0.0003-0.0041]	0.0014 [0.0003-0.0066]	0.0005 [0.0001-0.0040]	0.001	0.002	0.001	<0.001
Veillonella	0.0003 [0.0001-0.0016]	0.0004 [0.0001-0.0021]	0.0003 [0.0001-0.0020]	0.0007 [0.0001-0.0046]	0.350	0.238	0.059	0.018
Parabacteroides	0.0037 [0.0014-0.0069]	0.0065 [0.0024-0.0133]	0.0049 [0.0020-0.0101]	0.0057 [0.0025-0.0118]	0.001	0.032	0.424	0.079
Klebsiella	0.0001 [<0.0001-0.0005]	0.0001 [<0.0001-0.0008]	0.0006 [0.0001-0.0051]	0.0006 [0.0001-0.0049]	0.419	<0.001	<0.001	0.419
Ruminococcaceae_incertae_sedis	0.0042 [0.0025-0.0074]	0.0044 [0.0025-0.0075]	0.0060 [0.0036-0.0105]	0.0065 [0.0035-0.0106]	0.733	<0.001	<0.001	0.733
Lactobacillus	0.0027 [0.0006-0.0083]	0.0010 [0.0003-0.0036]	0.0001 [0.0000-0.0007]	0.0001 [<0.0001-0.0009]	<0.001	<0.001	<0.001	0.206
Megasphaera	0.0001 [0.0000-0.0029]	0.0006 [<0.0001-0.0057]	<0.0001 [0.0000-0.0006]	<0.0001 [0.0000-0.0024]	0.018	<0.001	<0.001	0.021
Anaerostipes	0.0006 [0.0002-0.0016]	0.0008 [0.0003-0.0025]	0.0017 [0.0004-0.0054]	0.0017 [0.0004-0.0067]	0.029	<0.001	<0.001	0.704
Enterobacteriaceae_unclassified	0.0002 [<0.0001-0.0007]	0.0003 [0.0001-0.0015]	0.0012 [0.0002-0.0053]	0.0008 [0.0001-0.0046]	0.107	<0.001	<0.001	0.067
Peptostreptococcaceae_incertae_sedis	0.0032 [0.0014-0.0088]	0.0016 [0.0008-0.0035]	0.0014 [0.0004-0.0035]	0.0011 [0.0002-0.0031]	<0.001	<0.001	<0.001	0.008
Enterobacter	0.0001 [0.0000-0.0005]	0.0001 [0.0000-0.0012]	0.0005 [<0.0001-0.0031]	0.0004 [<0.0001-0.0029]	0.085	<0.001	0.001	0.632
Parasutterella	0.0003 [<0.0001-0.0023]	0.0007 [0.0001-0.0040]	0.0006 [0.0001-0.0044]	0.0012 [0.0001-0.0066]	0.111	0.111	0.404	0.167
S24-7_norank	<0.0001 [0.0000-0.0085]	0.0000 [0.0000-0.0001]	<0.0001 [0.0000-0.0001]	0.0000 [0.0000-0.0001]	0.005	0.005	0.029	0.001
Dorea	0.0023 [0.0012-0.0049]	0.0018 [0.0009-0.0038]	0.0022 [0.0009-0.0047]	0.0020 [0.0009-0.0045]	0.095	0.386	0.630	0.223
Streptococcus	0.0005 [0.0001-0.0014]	0.0004 [0.0002-0.0013]	0.0005 [0.0002-0.0016]	0.0009 [0.0003-0.0034]	0.682	0.435	0.001	<0.001
Ruminococcaceae_unclassified	0.0040 [0.0022-0.0064]	0.0039 [0.0018-0.0064]	0.0023 [0.0010-0.0043]	0.0015 [0.0003-0.0034]	0.998	<0.001	<0.001	<0.001
Defluviitaleaceae_incertae_sedis	0.0004 [<0.0001-0.0016]	0.0005 [<0.0001-0.0021]	0.0006 [<0.0001-0.0023]	0.0005 [0.0000-0.0023]	0.550	0.535	0.737	0.550
Barnesiella	0.0006 [<0.0001-0.0047]	0.0007 [0.0000-0.0047]	0.0002 [0.0000-0.0030]	<0.0001 [0.0000-0.0016]	0.919	0.093	<0.001	<0.001
Erysipelotrichaceae_uncultured	0.0003 [0.0001-0.0007]	0.0004 [0.0001-0.0012]	0.0010 [0.0003-0.0028]	0.0009 [0.0002-0.0028]	0.016	<0.001	0.001	0.415
Desulfovibrio	<0.0001 [0.0000-0.0058]	<0.0001 [0.0000-0.0029]	<0.0001 [0.0000-0.0007]	0.0000 [0.0000-0.0001]	0.438	0.020	<0.001	0.002
Alloprevotella	0.0000 [0.0000-<0.0001]	0.0000 [0.0000-0.0000]	0.0000 [0.0000-<0.0001]	0.0000 [0.0000-0.0000]	0.314	0.776	0.994	0.064
Paraprevotella	0.0001 [0.0000-0.0013]	<0.0001 [0.0000-0.0014]	<0.0001 [0.0000-0.0029]	0.0000 [0.0000-0.0011]	0.919	0.507	0.070	0.010
Prevotellaceae_uncultured	0e+00 [0e+00-0e+00]	0e+00 [0e+00-0e+00]	0e+00 [0e+00-1e-04]	0e+00 [0e+00-0e+00]	0.015	0.213	0.681	<0.001
Collinsella	0.0011 [0.0003-0.0036]	0.0008 [0.0001-0.0025]	0.0002 [0.0000-0.0009]	0.0003 [0.0000-0.0015]	0.148	<0.001	<0.001	0.147
Sutterella	0.0001 [0.0000-0.0005]	0.0003 [0.0000-0.0010]	0.0002 [0.0000-0.0017]	0.0001 [0.0000-0.0012]	0.079	0.196	0.079	0.079
RF9_norank	0.0003 [0.0000-0.0026]	0.0001 [0.0000-0.0026]	0.0000 [0.0000-0.0007]	0.0000 [0.0000-0.0002]	0.567	<0.001	<0.001	0.053
Haemophilus	0.0003 [<0.0001-0.0012]	0.0001 [<0.0001-0.0006]	0.0001 [0.0000-0.0006]	0.0001 [0.0000-0.0008]	0.155	0.004	0.313	0.356
Flavonifractor	0.0001 [<0.0001-0.0004]	0.0002 [0.0001-0.0010]	0.0003 [<0.0001-0.0010]	0.0004 [0.0001-0.0018]	0.001	<0.001	0.130	0.059
Erysipelotrichaceae_incertae_sedis	0.0002 [<0.0001-0.0014]	0.0001 [<0.0001-0.0010]	0.0001 [0.0000-0.0006]	0.0001 [0.0000-0.0007]	0.275	0.148	0.803	0.803
Anaerotruncus	0.0007 [<0.0001-0.0026]	0.0003 [<0.0001-0.0015]	0.0001 [0.0000-0.0011]	0.0001 [0.0000-0.0006]	0.117	<0.001	<0.001	0.009
Defluviitaleaceae_uncultured	0.0005 [0.0002-0.0010]	0.0007 [0.0002-0.0015]	0.0008 [0.0001-0.0022]	0.0006 [0.0000-0.0018]	0.393	0.202	0.393	0.071
Peptostreptococcaceae_unclassified	0.0005 [0.0002-0.0015]	0.0004 [0.0002-0.0009]	0.0003 [0.0001-0.0010]	0.0002 [<0.0001-0.0008]	0.057	0.001	<0.001	0.012
Coriobacteriaceae_uncultured	0.0003 [<0.0001-0.0008]	0.0004 [0.0001-0.0012]	0.0001 [0.0000-0.0007]	0.0001 [0.0000-0.0010]	0.139	0.001	<0.001	0.504
Paracoccus	0.0000 [0.0000-0.0000]	0.0000 [0.0000-0.0000]	0.0000 [0.0000-0.0000]	0.0000 [0.0000-0.0000]	0.046	0.088	0.135	0.009
Bilophila	0.0002 [<0.0001-0.0008]	0.0003 [<0.0001-0.0012]	0.0003 [0.0000-0.0012]	0.0002 [0.0000-0.0011]	0.344	0.344	0.344	0.344
Clostridiales_unclassified	0.0007 [0.0002-0.0014]	0.0008 [0.0003-0.0016]	0.0004 [0.0001-0.0011]	0.0002 [<0.0001-0.0006]	0.293	0.001	<0.001	<0.001
Gastranaerophilales_norank	0.0000 [0.0000-0.0000]	0.0000 [0.0000-0.0000]	0.0000 [0.0000-0.0000]	0.0000 [0.0000-0.0000]	0.886	0.886	0.084	0.022
Succinivibrio	0.0000 [0.0000-0.0000]	0.0000 [0.0000-0.0000]	0.0000 [0.0000-0.0000]	0.0000 [0.0000-0.0000]	<0.001	<0.001	0.256	0.005
Odoribacter	0.0002 [0.0000-0.0008]	0.0002 [0.0000-0.0010]	0.0003 [0.0000-0.0012]	0.0001 [0.0000-0.0010]	0.936	0.443	0.306	0.011
MR: Mountain rural, MU: Mountain urban, PR: Plain rural, PU: Plain urban. Data are presented as median and interquartile range in squared parentheses and were tested using the Wilcoxon rank-sum test. P values <.05 were considered statistically significant.
